# Supplementary material for: RTX-KG2: a system for building a semantically standardized knowledge graph for translational biomedicine
Source: PubMed Central journal article supplement (PMC9520835; doi:10.1186/s12859-022-04932-3), 2022-09-29
Supplement: 12859_2022_4932_MOESM1_ESM.pdf [file 12859_2022_4932_MOESM1_ESM.pdf]

## B Supplementary Material

Table S1: Ontologies from the OBO Foundry that are included in RTX-KG2.

|                                                                             |                  |
|-----------------------------------------------------------------------------|------------------|
| Basic Formal Ontology                                                       | BFO              |
| Chemical Entities of Biological Interest (ChEBI)                            | CHEBI [122]      |
| Gene Ontology, with external relationships                                  | go-plus          |
| Relation Ontology                                                           | RO               |
| Uberon multi-species anatomy ontology, extended with external relationships | UBERON           |
| Foundational Model of Anatomy                                               | FMA              |
| Dictyostelium discoideum anatomy                                            | DDANAT [123–127] |
| Cell Ontology                                                               | CL [128]         |
| Food Ontology                                                               | FOODON           |
| Human Developmental Anatomy, abstract                                       | EHDAA2 [129]     |
| Biological Spatial Ontology                                                 | BSPO             |
| Human Phenotype Ontology                                                    | HPO              |
| Neuro Behavior Ontology                                                     | NBO              |
| NCBI organismal classification, taxslim subset                              | ncbitaxon [103]  |
| Phenotype and Trait Ontology                                                | PATO             |
| Mondo Disease Ontology                                                      | MONDO            |
| Disease Ontology                                                            | DO               |
| Protein Ontology                                                            | PRO [130]        |
| Interaction Network Ontology                                                | INO              |
| Genomic Epidemiology Ontology                                               | GENEPIO          |
| Molecular Interactions Controlled Vocabulary                                | MI               |
